# Supplementary material for: Fruit Phenolic and Triterpenic Composition of Progenies of Olea europaea subsp. cuspidata, an Interesting Phytochemical Source to Be Included in Olive Breeding Programs
Source: MDPI journal article supplement (doi:10.3390/plants11141791), 2022-07-06
Supplement: s1 [file s1]

Table S1. Quantitative data for each and every compound quantified in the progeny, the female parent and the cultivars (mg·kg<sup>-1</sup>)

| Sample       | Acyclodihydroelenolic acid<br>hexoside (B) | Caffeoyl 6-secologanoside | Dehydro nuzhenide | Dihydro oleuropein | Demethyl ligstroside | Elenolic acid glucoside (C) | Ligstroside | Lucidumoside C (A) | Methoxy oleuropein (A) | Neonuzhenide | Oleoside/secologanoside (C) | Oleuropein | Demethyl oleuropein | Oleuropein aglycone (A) | Oleuropein aglycone (B) | Verbascoside | β-hydroxy verbascoside | Quinic acid | Hydroxytyrosol glucoside | Maslinic acid | Oleanolic acid | Betulinic acid | Rutin (B) | Luteolin glucoside (B) | Luteolin 7-O-glucoside | Unknown 1 (m/z 363) | Unknown 2 (m/z 421) |
|--------------|--------------------------------------------|---------------------------|-------------------|--------------------|----------------------|-----------------------------|-------------|--------------------|------------------------|--------------|-----------------------------|------------|---------------------|-------------------------|-------------------------|--------------|------------------------|-------------|--------------------------|---------------|----------------|----------------|-----------|------------------------|------------------------|---------------------|---------------------|
| 315-71-G14 a | 1672.0                                     | 140.4                     | 13.2              | 185.1              | 318.2                | 994.0                       | 29.1        | 68.6               | 209.0                  | 126.9        | 100.9                       | 178.8      | 515.7               | 66.5                    | 114.4                   | n.d          | n.d                    | 13136.8     | 1194.7                   | 9897.9        | 3553.0         | 72.8           | 2855.3    | 10.4                   | n.d                    | 821.4               | 106.1               |
| 315-71-G14 b | 1544.0                                     | 129.6                     | 12.2              | 170.9              | 293.8                | 918.0                       | 26.9        | 63.4               | 193.0                  | 117.1        | 93.1                        | 165.2      | 476.3               | 61.5                    | 105.6                   | n.d          | n.d                    | 12131.2     | 1103.3                   | 9140.1        | 3281.0         | 67.2           | 2636.7    | 9.6                    | n.d                    | 758.6               | 97.9                |
| 315-77-G14 a | 2277.2                                     | 49.9                      | 253.7             | 75.7               | 616.6                | 2225.2                      | 1397.5      | 3825.4             | 208.0                  | 153.9        | 1098.0                      | 7806.8     | 1480.7              | 2249.1                  | 1910.1                  | 1316.4       | 197.6                  | 12584.7     | 793.4                    | 13772.2       | 5414.2         | 37.4           | 3824.4    | 301.5                  | 451.3                  | 131.0               | 954.5               |
| 315-77-G14 b | 2102.8                                     | 46.1                      | 234.3             | 69.9               | 569.4                | 2054.8                      | 1290.5      | 3532.6             | 192.0                  | 142.1        | 1014.0                      | 7209.2     | 1367.3              | 2076.9                  | 1763.9                  | 1215.6       | 182.4                  | 11621.3     | 732.6                    | 12717.8       | 4999.8         | 34.6           | 3531.6    | 278.5                  | 416.7                  | 121.0               | 881.5               |
| 315-81-G14 a | 670.7                                      | 61.3                      | 166.4             | 72.8               | 2548.5               | 6233.6                      | 486.6       | 1990.2             | 606.2                  | 788.2        | 2087.9                      | 7761.1     | 3718.3              | 13.5                    | 31.2                    | 1743.7       | 165.3                  | 16384.1     | 3690.3                   | 6379.2        | 1272.7         | 21.8           | 6038.1    | 257.9                  | 476.2                  | 235.0               | 117.5               |
| 315-81-G14 b | 619.3                                      | 56.7                      | 153.6             | 67.2               | 2353.5               | 5756.4                      | 449.4       | 1837.8             | 559.8                  | 727.8        | 1928.1                      | 7166.9     | 3433.7              | 12.5                    | 28.8                    | 1610.3       | 152.7                  | 15129.9     | 3407.7                   | 5890.8        | 1175.3         | 20.2           | 5575.9    | 238.1                  | 439.8                  | 217.0               | 108.5               |
| 315-85-G14 a | 1912.2                                     | 281.8                     | 400.3             | 346.1              | 377.4                | 3407.4                      | 5368.5      | 5209.4             | 97.7                   | 165.3        | 2099.4                      | 42973.9    | 572.9               | 1744.8                  | 2293.8                  | 4270.5       | 431.5                  | 11380.6     | 3152.7                   | 11043.7       | 3314.9         | 54.1           | 9663.9    | 132.1                  | 138.3                  | 122.4               | 662.4               |
| 315-85-G14 b | 1765.8                                     | 260.2                     | 369.7             | 319.7              | 348.6                | 3146.6                      | 4957.5      | 4810.6             | 90.3                   | 152.7        | 1938.6                      | 39684.1    | 529.1               | 1611.2                  | 2118.2                  | 3943.5       | 398.5                  | 10509.4     | 2911.3                   | 10198.3       | 3061.1         | 49.9           | 8924.1    | 121.9                  | 127.7                  | 113.1               | 611.6               |
| 315-93-G14 a | 311.9                                      | 346.3                     | 39.9              | 167.4              | 810.0                | 968.1                       | 265.1       | 210.0              | 177.8                  | 115.4        | 280.7                       | 1167.7     | 986.8               | 115.4                   | 617.6                   | n.q          | 35.4                   | 7721.6      | 447.1                    | 9248.0        | 2228.3         | 17.7           | 5438.2    | 136.2                  | 511.6                  | 54.1                | 214.2               |
| 315-93-G14 b | 288.1                                      | 319.7                     | 36.9              | 154.6              | 748.0                | 893.9                       | 244.9       | 194.0              | 164.2                  | 106.6        | 259.3                       | 1078.3     | 911.2               | 106.6                   | 570.4                   | n.q          | 32.6                   | 7130.4      | 412.9                    | 8540.0        | 2057.7         | 16.3           | 5021.8    | 125.8                  | 472.4                  | 49.9                | 197.8               |
| 315-98-G14 a | 1215.5                                     | 79.0                      | 62.9              | 263.1              | 953.5                | 2874.0                      | 76.9        | 112.3              | 685.2                  | 250.6        | 2501.8                      | 590.6      | 4093.7              | 223.6                   | 370.2                   | n.q          | 87.3                   | 12340.3     | 9056.7                   | 11711.3       | 4502.3         | 71.9           | 4133.2    | 128.9                  | 358.7                  | 1407.9              | 539.7               |
| 315-98-G14 b | 1122.5                                     | 73.0                      | 58.1              | 242.9              | 880.5                | 2654.0                      | 71.1        | 103.7              | 632.8                  | 231.4        | 2310.2                      | 545.4      | 3780.3              | 206.4                   | 341.8                   | n.q          | 80.7                   | 11395.7     | 8363.3                   | 10814.7       | 4157.7         | 66.3           | 3816.8    | 119.1                  | 331.3                  | 1300.1              | 498.3               |
| 316-11-G14 a | 841.2                                      | 59.3                      | 57.2              | 109.2              | 579.2                | 1374.6                      | 37.4        | 79.3               | 210.0                  | 127.9        | 422.2                       | 319.2      | 2020.3              | 61.3                    | 167.4                   | 443.0        | 69.7                   | 11557.4     | 1527.5                   | 8155.2        | 2963.4         | 17.7           | 3643.5    | 114.4                  | 261.0                  | 549.0               | 86.3                |
| 316-11-G14 b | 776.8                                      | 54.7                      | 52.8              | 100.8              | 534.8                | 1269.4                      | 34.6        | 73.3               | 194.0                  | 118.1        | 389.8                       | 294.8      | 1865.7              | 56.7                    | 154.6                   | 409.0        | 64.3                   | 10672.6     | 1410.5                   | 7530.8        | 2736.6         | 16.3           | 3364.5    | 105.6                  | 241.0                  | 507.0               | 79.7                |
| 316-14-G14 a | 774.7                                      | 765.3                     | 62.4              | 100.9              | 316.1                | 1925.7                      | 382.6       | 2523.6             | 453.4                  | 726.8        | 1444.3                      | 8243.5     | 1647.0              | 243.3                   | 220.4                   | n.q          | 67.6                   | 9378.0      | 1496.3                   | 9509.0        | 4267.3         | 43.5           | 7150.7    | 457.5                  | 674.8                  | 1591.9              | 706.0               |
| 316-14-G14 b | 715.3                                      | 706.7                     | 57.6              | 93.1               | 291.9                | 1778.3                      | 353.4       | 2330.4             | 418.6                  | 671.2        | 1333.7                      | 7612.5     | 1521.0              | 224.7                   | 203.6                   | n.q          | 62.4                   | 8660.0      | 1381.7                   | 8781.0        | 3940.7         | 40.1           | 6603.3    | 422.5                  | 623.2                  | 1470.1              | 652.0               |
| 316-16-G14 a | 277.6                                      | 70.7                      | 67.6              | 51.0               | 889.0                | 2664.0                      | 38.5        | 87.3               | 345.2                  | 367.0        | 685.2                       | 485.6      | 2331.2              | 15.0                    | 48.9                    | 995.1        | 84.2                   | 16948.7     | 1721.9                   | 9935.3        | 3370.0         | 19.8           | 6709.8    | 372.2                  | 797.5                  | 248.5               | 62.4                |
| 316-16-G14 b | 256.4                                      | 65.3                      | 62.4              | 47.0               | 821.0                | 2460.0                      | 35.5        | 80.7               | 318.8                  | 339.0        | 632.8                       | 448.4      | 2152.8              | 13.8                    | 45.1                    | 918.9        | 77.8                   | 15651.3     | 1590.1                   | 9174.7        | 3112.0         | 18.2           | 6196.2    | 343.8                  | 736.5                  | 229.5               | 57.6                |
| 316-20-G14 a | 1387.1                                     | 241.2                     | 25.0              | 46.8               | 125.8                | 2635.9                      | n.d         | 106.1              | 247.5                  | 176.8        | 209.0                       | 143.5      | 1661.6              | 43.7                    | 113.0                   | n.d          | n.d                    | 12158.4     | 1132.3                   | 7503.2        | 3550.9         | 9.4            | 2022.4    | 119.6                  | 380.6                  | 528.2               | 149.7               |
| 316-20-G14 b | 1280.9                                     | 222.8                     | 23.0              | 43.2               | 116.2                | 2434.1                      | n.d         | 97.9               | 228.5                  | 163.2        | 193.0                       | 132.5      | 1534.4              | 40.3                    | 104.4                   | n.d          | n.d                    | 11227.6     | 1045.7                   | 6928.8        | 3279.1         | 8.6            | 1867.6    | 110.4                  | 351.4                  | 487.8               | 138.3               |
| 316-24-G14 a | 423.2                                      | 59.3                      | 76.9              | 38.5               | 973.3                | 1941.3                      | 70.7        | 245.4              | 199.6                  | 193.4        | 681.1                       | 1426.6     | 1523.3              | 43.7                    | 115.4                   | 532.4        | 139.3                  | 16948.7     | 3326.3                   | 6694.2        | 3311.8         | 21.8           | 2639.0    | 178.8                  | 263.1                  | 647.8               | 228.8               |
| 316-24-G14 b | 390.8                                      | 54.7                      | 71.1              | 35.5               | 898.7                | 1792.7                      | 65.3        | 226.6              | 184.4                  | 178.6        | 628.9                       | 1317.4     | 1406.7              | 40.3                    | 106.6                   | 491.6        | 128.7                  | 15651.3     | 3071.7                   | 6181.8        | 3058.2         | 20.2           | 2437.0    | 165.2                  | 242.9                  | 598.2               | 211.2               |
| 316-26-G14 a | 677.9                                      | 17.7                      | 82.0              | 226.7              | 633.2                | 1146.9                      | 343.1       | 610.4              | 188.2                  | 522.0        | 545.9                       | 2571.4     | 561.5               | 262.0                   | 234.0                   | 854.7        | 65.5                   | 8238.3      | 1267.5                   | 8309.0        | 1975.6         | 14.6           | 5881.1    | 184.0                  | 713.3                  | 296.3               | 166.4               |
| 316-26-G14 b | 626.1                                      | 16.3                      | 75.8              | 209.3              | 584.8                | 1059.1                      | 316.9       | 563.6              | 173.8                  | 482.0        | 504.1                       | 2374.6     | 518.5               | 242.0                   | 216.0                   | 789.3        | 60.5                   | 7607.7      | 1170.5                   | 7673.0        | 1824.4         | 13.4           | 5430.9    | 170.0                  | 658.7                  | 273.7               | 153.6               |
| 316-28-G14 a | 800.6                                      | 340.0                     | 605.2             | 229.8              | 241.2                | 1151.1                      | 569.8       | 1250.8             | 126.9                  | 214.2        | 672.8                       | 5774.0     | 443.0               | 1574.3                  | 2053.6                  | 4323.5       | 773.2                  | 19207.2     | 4125.9                   | 12111.6       | 6577.8         | 41.5           | 3156.8    | 263.1                  | 477.3                  | 190.1               | 988.8               |
| 316-28-G14 b | 739.4                                      | 314.0                     | 558.8             | 212.2              | 222.8                | 1062.9                      | 526.2       | 1155.0             | 117.1                  | 197.8        | 621.2                       | 5332.0     | 409.0               | 1453.7                  | 1896.4                  | 3992.5       | 714.0                  | 17736.8     | 3810.1                   | 11184.4       | 6074.2         | 38.3           | 2915.2    | 242.9                  | 440.7                  | 175.5               | 913.2               |
| 316-30-G14 a | 664.4                                      | 8.3                       | 479.3             | 121.7              | 595.8                | 1515.0                      | 6297.0      | 2240.8             | 44.7                   | 212.5        | 1385.0                      | 7884.8     | 123.7               | 269.3                   | 967.0                   | 4489.9       | 499.1                  | 13940.6     | 2124.3                   | 13565.2       | 5757.4         | 57.2           | 12385.1   | 47.8                   | 142.6                  | 83.2                | 394.1               |
| 316-30-G14 b | 613.6                                      | 7.7                       | 442.7             | 112.3              | 550.2                | 1399.0                      | 5815.0      | 2069.2             | 41.3                   | 196.3        | 1279.0                      | 7281.2     | 114.3               | 248.7                   | 893.0                   | 4146.1       | 460.9                  | 12873.4     | 1961.7                   | 12526.8       | 5316.6         | 52.8           | 11436.9   | 44.2                   | 131.6                  | 76.8                | 363.9               |
| 316-32-G14 a | 893.2                                      | 68.6                      | 227.7             | 332.7              | 2294.8               | 2699.3                      | 596.8       | 1227.0             | 741.4                  | 264.1        | 2089.0                      | 6150.4     | 5978.9              | 227.7                   | 230.8                   | 2003.7       | 322.3                  | 15780.0     | 2479.9                   | 5829.1        | 1502.5         | 34.3           | 14375.2   | 133.1                  | 234.0                  | 401.4               | 628.0               |
| 316-32-G14 b | 824.8                                      | 63.4                      | 210.3             | 307.3              | 2119.2               | 2492.7                      | 551.2       | 1133.0             | 684.6                  | 243.9        | 1929.0                      | 5679.6     | 5521.2              | 210.3                   | 213.2                   | 1850.3       | 297.7                  | 14572.0     | 2290.1                   | 5382.9        | 1387.5         | 31.7           | 13274.8   | 122.9                  | 216.0                  | 370.6               | 580.0               |
| 316-33-G14 a | 891.1                                      | 97.7                      | 55.1              | 281.8              | 6868.9               | 3214.0                      | 350.4       | 175.4              | 1013.8                 | 100.9        | 1619.0                      | 1962.1     | 8392.2              | 70.7                    | 182.0                   | 722.7        | 60.3                   | 14484.4     | 3310.7                   | 14317.0       | 5815.6         | 61.3           | 5752.2    | 376.4                  | 838.1                  | 180.9               | 158.0               |
| 316-33-G14 b | 822.9                                      | 90.3                      | 50.9              | 260.2              | 6343.1               | 2968.0                      | 323.6       | 162.0              | 936.2                  | 93.1         | 1495.0                      | 1811.9     | 7749.8              | 65.3                    | 168.0                   | 667.3        | 55.7                   | 13375.6     | 3057.3                   | 13221.0       | 5370.4         | 56.7           | 5311.8    | 347.6                  | 773.9                  | 167.1               | 146.0               |
| 316-35-G14 a | 1997.5                                     | 120.6                     | 777.8             | 183.0              | 988.8                | 3949.2                      | 3667.4      | 3822.3             | 209.0                  | 326.5        | 2620.3                      | 23539.0    | 1103.2              | 314.0                   | 422.2                   | 3509.3       | 932.7                  | 12047.1     | 2108.7                   | 12178.1       | 6261.7         | 78.0           | 9954.0    | 56.1                   | n.q                    | 335.9               | 1545.1              |
| 316-35-G14 b | 1844.5                                     | 111.4                     | 718.2             | 169.0              | 913.2                | 3646.8                      | 3386.6      | 3529.7             | 193.0                  | 301.5        | 2419.7                      | 21737.0    | 1018.8              | 290.0                   | 389.8                   | 3240.7       | 861.3                  | 11124.9     | 1947.3                   | 11245.9       | 5782.3         | 72.0           | 9192.0    | 51.9                   | n.q                    | 310.1               | 1426.9              |
| 316-37-G14 a | 619.7                                      | 42.6                      | 184.0             | 291.1              | 1546.2               | 2549.6                      | 94.6        | 164.3              | 217.7                  | 167.4        | 760.1                       | 1070.0     | 3214.0              | 128.9                   | 431.5                   | 3592.5       | 242.3                  | 10482.2     | 1680.3                   | 5331.1        | 1087.6         | 8.5            | 3931.5    | 175.7                  | 735.1                  | 235.0               | 281.8               |

Table S1. Quantitative data for each and every compound quantified in the progeny, the female parent and the cultivars (mg·kg<sup>-1</sup>)

| Sample          | Acyclothydroelenolic acid hexoside (B) | Caffeoyl 6-secologanoside | Dehydro nuzhenide | Dihydro oleuropein | Demethyl ligstroside | Elenolic acid glucoside (C) | Ligstroside | Lucidumoside C (A) | Methoxy oleuropein | Neonuzhenide | Oleoside/secologanoside (C) | Oleuropein | Demethyl oleuropein | Oleuropein aglycone (A) | Oleuropein aglycone (B) | Verbascoside | β-hydroxy verbascoside | Quinic acid | Hydroxytyrosol glucoside | Maslinic acid | Oleanolic acid | Betulinic acid | Rutin (B) | Luteolin glucoside (B) | Luteolin 7-O-glucoside | Unknown 1 (m/z 363) | Unknown 2 (m/z 421) |
|-----------------|----------------------------------------|---------------------------|-------------------|--------------------|----------------------|-----------------------------|-------------|--------------------|--------------------|--------------|-----------------------------|------------|---------------------|-------------------------|-------------------------|--------------|------------------------|-------------|--------------------------|---------------|----------------|----------------|-----------|------------------------|------------------------|---------------------|---------------------|
| 316-37-G14 b    | 572.3                                  | 39.4                      | 170.0             | 268.9              | 1427.8               | 2354.4                      | 87.4        | 151.7              | 201.1              | 154.6        | 701.9                       | 988.0      | 2968.0              | 119.1                   | 398.5                   | 3317.5       | 223.7                  | 9679.8      | 1551.7                   | 4922.9        | 1004.4         | 7.9            | 3630.5    | 162.3                  | 678.9                  | 217.0               | 260.2               |
| 316-38-G14 a    | 2352.0                                 | 30.2                      | 167.4             | 142.5              | 462.7                | 2121.2                      | 183.0       | 915.0              | 141.4              | 120.6        | 590.6                       | 1767.7     | 365.0               | 641.6                   | 555.3                   | 810.0        | 153.9                  | 12549.3     | 3570.7                   | 9913.5        | 3949.2         | 68.6           | 9370.7    | 791.3                  | 1034.6                 | 607.2               | 484.5               |
| 316-38-G14 b    | 2172.0                                 | 27.8                      | 154.6             | 131.5              | 427.3                | 1958.8                      | 169.0       | 845.0              | 130.6              | 111.4        | 545.4                       | 1632.3     | 337.0               | 592.4                   | 512.7                   | 748.0        | 142.1                  | 11588.7     | 3297.3                   | 9154.5        | 3646.8         | 63.4           | 8653.3    | 730.7                  | 955.4                  | 560.8               | 447.5               |
| 316-43-G14 a    | 1483.8                                 | 23.9                      | 96.7              | 100.5              | 1211.4               | 1297.7                      | 236.0       | 671.7              | 298.4              | 130.2        | 1007.6                      | 1055.4     | 629.1               | 71.7                    | 339.0                   | n.q          | 98.8                   | 14592.6     | 1580.5                   | 10180.7       | 6180.6         | 101.9          | 9291.7    | 183.0                  | 218.6                  | 976.4               | 1681.4              |
| 316-43-G14 b    | 1370.2                                 | 22.1                      | 89.3              | 92.9               | 1118.6               | 1198.3                      | 218.0       | 620.3              | 275.6              | 120.2        | 930.4                       | 974.6      | 580.9               | 66.3                    | 313.0                   | n.q          | 91.2                   | 13475.4     | 1459.5                   | 9401.3        | 5707.4         | 94.1           | 8580.3    | 169.0                  | 201.8                  | 901.6               | 1552.6              |
| 316-4-G14 a     | 1124.0                                 | 19.8                      | 997.2             | 94.6               | 237.1                | 1171.9                      | 2619.3      | 2796.0             | 42.6               | 130.0        | 1838.4                      | 5150.1     | 99.8                | 1261.3                  | 1588.4                  | 5065.9       | 1197.8                 | 14070.6     | 1159.4                   | 14302.4       | 5970.5         | 40.6           | 13887.6   | 74.2                   | 118.5                  | 316.1               | 1486.9              |
| 316-4-G14 b     | 1038.0                                 | 18.2                      | 920.8             | 87.4               | 218.9                | 1082.1                      | 2418.7      | 2582.0             | 39.4               | 120.0        | 1697.6                      | 4755.9     | 92.2                | 1164.7                  | 1466.8                  | 4678.1       | 1106.2                 | 12993.4     | 1070.6                   | 13207.6       | 5513.5         | 37.4           | 12824.4   | 68.6                   | 109.5                  | 291.9               | 1373.1              |
| 316-5-G14 a     | 785.0                                  | 164.3                     | 114.5             | 208.0              | 1724.0               | 2222.1                      | 934.8       | 244.4              | 252.7              | 222.5        | 411.8                       | 3819.2     | 1882.0              | 146.6                   | 196.5                   | 1227.0       | 111.3                  | 14338.8     | 2556.9                   | 6699.4        | 1646.0         | 22.0           | 5211.5    | 471.0                  | 596.8                  | 251.6               | 226.7               |
| 316-5-G14 b     | 725.0                                  | 151.7                     | 105.7             | 192.0              | 1592.0               | 2051.9                      | 863.2       | 225.6              | 233.3              | 205.5        | 380.2                       | 3526.8     | 1738.0              | 135.4                   | 181.5                   | 1133.0       | 102.7                  | 13241.2     | 2361.1                   | 6186.6        | 1520.0         | 20.4           | 4812.5    | 435.0                  | 551.2                  | 232.4               | 209.3               |
| 316-6-G14 a     | 1282.1                                 | 54.1                      | 29.1              | 88.4               | 736.2                | 1706.3                      | 162.2       | 144.5              | 295.3              | 153.9        | 1702.2                      | 2568.3     | 2565.2              | 144.5                   | 183.0                   | n.q          | 32.2                   | 13385.3     | 2780.4                   | 8735.4        | 2941.6         | 27.0           | 7096.6    | 520.9                  | 1016.9                 | 1207.2              | 232.9               |
| 316-6-G14 b     | 1183.9                                 | 49.9                      | 26.9              | 81.6               | 679.8                | 1575.7                      | 149.8       | 133.5              | 272.7              | 142.1        | 1571.8                      | 2371.7     | 2368.8              | 133.5                   | 169.0                   | n.q          | 29.8                   | 12360.7     | 2567.6                   | 8066.6        | 2716.4         | 25.0           | 6553.4    | 481.1                  | 939.1                  | 1114.8              | 215.1               |
| 316-87-G14 a    | 1344.5                                 | 136.2                     | 196.5             | 184.0              | 480.4                | 1349.7                      | 2358.3      | 2056.7             | 101.9              | 205.3        | 987.8                       | 7722.6     | 163.2               | 608.3                   | 453.4                   | 471.0        | 162.2                  | 13384.3     | 1112.6                   | 7924.3        | 2107.7         | 22.9           | 4799.7    | 41.6                   | 104.0                  | 639.5               | 1646.0              |
| 316-87-G14 b    | 1241.5                                 | 125.8                     | 181.5             | 170.0              | 443.6                | 1246.3                      | 2177.7      | 1899.3             | 94.1               | 189.5        | 912.2                       | 7131.4     | 150.8               | 561.7                   | 418.6                   | 435.0        | 149.8                  | 12359.7     | 1027.4                   | 7317.7        | 1946.3         | 21.1           | 4432.3    | 38.4                   | 96.0                   | 590.5               | 1520.0              |
| 316-89-G14 a    | 432.6                                  | 82.1                      | 37.7              | 71.7               | 907.7                | 2055.7                      | 71.7        | 807.9              | 228.8              | 304.7        | 2664.0                      | 3621.6     | 2701.4              | 72.8                    | 211.1                   | n.q          | 36.4                   | 13049.5     | 2572.5                   | 11150.8       | 3291.0         | 40.6           | 6181.6    | 403.4                  | 1050.2                 | 1063.5              | 230.8               |
| 316-89-G14 b    | 399.4                                  | 75.9                      | 34.9              | 66.3               | 838.3                | 1898.3                      | 66.3        | 746.1              | 211.2              | 281.3        | 2460.0                      | 3344.4     | 2494.6              | 67.2                    | 194.9                   | n.q          | 33.6                   | 12050.5     | 2375.5                   | 10297.2       | 3039.0         | 37.4           | 5708.4    | 372.6                  | 969.8                  | 982.1               | 213.2               |
| 316-8-G14 a     | 848.5                                  | 73.8                      | 14.6              | 151.6              | 359.8                | 872.4                       | 84.2        | 151.8              | 131.0              | 213.2        | 737.2                       | 545.9      | 1578.4              | 294.3                   | 506.4                   | n.q          | 6.2                    | 10953.3     | 2681.6                   | 9193.9        | 2541.3         | 26.0           | 4781.0    | 294.3                  | 675.9                  | 639.5               | 163.2               |
| 316-8-G14 b     | 783.5                                  | 68.2                      | 13.4              | 140.0              | 332.2                | 805.6                       | 77.8        | 140.2              | 121.0              | 196.8        | 680.8                       | 504.1      | 1457.6              | 271.7                   | 467.6                   | n.q          | 5.8                    | 10114.7     | 2476.4                   | 8490.1        | 2346.7         | 24.0           | 4415.0    | 271.7                  | 624.1                  | 590.5               | 150.8               |
| 316-91-G14 a    | 1729.2                                 | 213.2                     | 75.9              | 141.4              | 115.9                | 2159.7                      | 7662.3      | 5360.2             | 29.0               | 335.9        | 978.5                       | 31830.4    | 85.3                | 1055.4                  | 1223.8                  | 1880.0       | 241.2                  | 13067.2     | 693.5                    | 15041.7       | 6189.9         | 41.6           | 10599.7   | 531.3                  | 685.2                  | 298.4               | 793.4               |
| 316-91-G14 b    | 1596.8                                 | 196.8                     | 70.1              | 130.6              | 107.1                | 1994.3                      | 7075.7      | 4949.8             | 26.8               | 310.1        | 903.5                       | 29393.6    | 78.7                | 974.6                   | 1130.2                  | 1736.0       | 222.8                  | 12066.8     | 640.5                    | 13890.3       | 5716.1         | 38.4           | 9788.3    | 490.7                  | 632.8                  | 275.6               | 732.6               |
| Female parent a | 106.1                                  | 38.3                      | 74.9              | 86.3               | n.d                  | 149.3                       | 447.1       | 657.2              | n.d                | 190.3        | 470.0                       | 3442.8     | n.d                 | 209.0                   | 586.4                   | n.q          | 35.4                   | 4461.8      | 585.4                    | 9584.9        | 2920.8         | 167.4          | 7060.2    | 321.3                  | 567.7                  | 7.7                 | 363.9               |
| Female parent b | 97.9                                   | 35.3                      | 69.1              | 79.7               | n.d                  | 137.9                       | 412.9       | 606.8              | n.d                | 175.7        | 434.0                       | 3179.2     | n.d                 | 193.0                   | 541.6                   | n.q          | 32.6                   | 4120.2      | 540.6                    | 8851.1        | 2697.2         | 154.6          | 6519.8    | 296.7                  | 524.3                  | 7.1                 | 336.1               |
| Arbequina a     | 1610.7                                 | 142.5                     | 14.3              | 65.5               | n.d                  | 93.6                        | 18.7        | 97.7               | 30.4               | n.d          | 94.6                        | 245.4      | 199.3               | 676.9                   | 1313.3                  | 742.9        | n.d                    | 10776.5     | 1889.3                   | 11799.7       | 3741.2         | 18.7           | 2064.0    | 118.5                  | 829.8                  | 36.4                | 92.5                |
| Arbequina b     | 1487.3                                 | 131.5                     | 13.3              | 60.5               | n.d                  | 86.4                        | 17.3        | 90.3               | 28.0               | n.d          | 87.4                        | 226.6      | 184.1               | 625.1                   | 1212.7                  | 686.1        | n.d                    | 9951.5      | 1744.7                   | 10896.3       | 3454.8         | 17.3           | 1906.0    | 109.5                  | 766.2                  | 33.6                | 85.5                |
| Frantoio a      | 2046.3                                 | 235.0                     | 215.2             | 1548.3             | 615.6                | 2076.5                      | 1367.3      | 351.5              | 32.2               | 334.8        | 254.8                       | 6979.1     | 1129.2              | 795.4                   | 3065.3                  | 4177.9       | 188.2                  | 12606.5     | 1109.5                   | 6806.5        | 1382.9         | 5.4            | 603.1     | 16.6                   | 266.2                  | 80.1                | 412.8               |
| Frantoio b      | 1889.7                                 | 217.0                     | 198.8             | 1429.7             | 568.4                | 1917.5                      | 1262.7      | 324.5              | 29.8               | 309.2        | 235.2                       | 6444.9     | 1042.8              | 734.6                   | 2830.7                  | 3858.1       | 173.8                  | 11641.5     | 1024.5                   | 6285.5        | 1277.1         | 5.0            | 556.9     | 15.4                   | 245.8                  | 73.9                | 381.2               |
| Koroneiki a     | 1309.1                                 | 152.9                     | 60.3              | 927.5              | n.d                  | 1980.8                      | 2086.9      | 642.6              | n.d                | n.d          | 751.8                       | 23432.9    | n.d                 | 395.1                   | 1044.0                  | 1464.0       | 70.7                   | 14005.1     | 1840.4                   | 12990.2       | 3669.5         | 19.0           | 1068.9    | 10.4                   | 106.1                  | n.d                 | 118.5               |
| Koroneiki b     | 1208.9                                 | 141.1                     | 55.7              | 856.5              | n.d                  | 1829.2                      | 1927.1      | 593.4              | n.d                | n.d          | 694.2                       | 21639.1    | n.d                 | 364.9                   | 964.0                   | 1352.0       | 65.3                   | 12932.9     | 1699.6                   | 11995.8       | 3388.5         | 17.6           | 987.1     | 9.6                    | 97.9                   | n.d                 | 109.5               |
| Pical a         | 1268.6                                 | 556.3                     | 7.9               | 598.9              | n.d                  | 1040.8                      | 735.1       | 810.0              | n.d                | n.d          | 204.8                       | 14391.9    | n.d                 | 2524.6                  | 2954.1                  | n.q          | 1.9                    | 16782.4     | 1124.0                   | 9137.8        | 2866.7         | 17.7           | 1594.0    | 54.6                   | 545.9                  | 12.5                | 85.3                |
| Pical b         | 1171.4                                 | 513.7                     | 7.3               | 553.1              | n.d                  | 961.2                       | 678.9       | 748.0              | n.d                | n.d          | 189.2                       | 13290.1    | n.d                 | 2331.4                  | 2727.9                  | n.q          | 1.7                    | 15497.6     | 1038.0                   | 8438.2        | 2647.3         | 16.3           | 1472.0    | 50.4                   | 504.1                  | 11.5                | 78.7                |

SD values have not been included to contain the size of the table. Coefficient of variation (%) were below 4.3% in every case.
